# Supplementary material for: Non-linear relationship between the body roundness index and incident type 2 diabetes in Japan: a secondary retrospective analysis
Source: J Transl Med. 2022 Mar 7;20:110. doi: 10.1186/s12967-022-03321-x (PMC8900386; doi:10.1186/s12967-022-03321-x)
Supplement: Supplementary file 1 — Additional file 1: Table S1. The results of univariate COX regression. Table S2. Relationship between BRI and incident diabetes in different sensitivity analyses. Table S3. AUC with the 95% CI of BMI, WC, ABSI and BRI for predicting DM stratified by sex. [file 12967_2022_3321_MOESM1_ESM.docx]

Supplementary data

Non-linear relationship between the body roundness index and incident type 2 diabetes in Japan: a secondary retrospective analysis

Running title: body roundness index and incident diabetes mellitus

Liling Wu1,2†, Hailu Pu1,2, Man Zhang3,4, Haofei Hu1,2*, Qijun Wan1,2*

1Department of Nephrology, The First Affiliated Hospital of Shenzhen University, Shenzhen 518000, Guangdong Province, China.

2Department of Nephrology, Shenzhen Second People’s Hospital, Shenzhen 518000, Guangdong Province, China.

3Department of Functional Neurology, The First Affiliated Hospital of Shenzhen University, Shenzhen 518000, Guangdong Province, China.

4Department of Functional Neurology, Shenzhen Second People’s Hospital, Shenzhen 518000, Guangdong Province, China.

Full list of author information is available at the end of the article.

*Correspondence: [yiyuan2224@sina.com](mailto:yiyuan2224@sina.com) and huhaofei0319@126.com.

**Total number of tables**: 3

**Table S1. The results of univariate COX regression**

|  | **Statistics** | **HR（95%CI）** | | ***P*-value** | |
| --- | --- | --- | --- | --- | --- |
| Age, years | 43.71 ± 8.90 | 1.06 (1.05, 1.07) | | <0.001 | |
| **Gender -n (%)** | | | <0.001 | |
| Female | 6946 (45.37%) | 1.0 | |  | |
| Male | 8364 (54.63%) | 2.71 (2.10, 3.49) | |  | |
| BRI | 2.71 ± 0.83 | 2.66 (2.38, 2.98) | | <0.001 | |
| TC (mmol/L) | 5.12 ± 0.86 | 1.47 (1.32, 1.64) | | <0.001 | |
| TG (mmol/L) | 0.91 ± 0.65 | 1.80 (1.68, 1.93) | | <0.001 | |
| HDL-c (mmol/L) | 1.46 ± 0.40 | 0.15 (0.11, 0.21) | | <0.001 | |
| SBP (mmHg) | 114.30 ± 14.85 | 1.03 (1.02, 1.04) | | <0.001 | |
| DBP (mmHg) | 71.47 ± 10.45 | 1.05 (1.04, 1.06) | | <0.001 | |
| FBG (mmol/L) | 5.16 ± 0.41 | 26.53 (19.34, 36.37)) | | <0.001 | |
| HbA1c（%） | 5.17 ± 0.32 | 56.83 (40.95, 78.87) | | <0.001 | |
| GGT (U/L) | 20.21 ± 18.00 | 1.01 (1.01, 1.01) | | <0.001 | |
| ALT (U/L) | 19.83 ± 14.05 | 1.01 (1.01, 1.01) | | <0.001 | |
| AST (U/L) | 18.33 ± 8.50 | 1.01 (1.01, 1.01) | | <0.001 | |
| Ethanol consumption g/wk | 47.97 ± 82.50 | 1.00 (1.00, 1.00) | | <0.001 | |
| Smoking status | | | | <0.001 | |
| Never-smoker | 8928 (58.31%) | 1.0 | |  | |
| Past-smoker | 2938 (19.19%) | 1.83 (1.38, 2.43) | |  | |
| Current-smoker | 3444 (22.50%) | 2.72 (2.15, 3.45) | |  | |
| Habit of exercise | | | | 0.069 | |
| No | 12614 (82.39%) | 1.0 | |  | |
| Yes | 2696 (17.61%) | 0.75 (0.56, 1.02) | |  | |
| Fatty liver | | | | <0.001 | |
| No | 12688 (82.87%) | 1.0 | |  | |
| Yes | 2622 (17.13%) | 6.67 (5.39, 8.25) | |  | |

ALT: alanine aminotransferase; AST: aspartate aminotransferase; BRI: body roundness index; DBP: diastolic blood pressure; FBG: fasting blood glucose; GGT: glutamyl transpeptidase; HbA1c: hemoglobin A1c; HDL-C: high-density lipoprotein cholesterol; SBP: systolic blood pressure; TC: total cholesterol; TG: triglyceride.

**Table S2. Relationship between BRI and incident diabetes in different sensitivity analyses**

| Exposure | ModelI (HR,95%CI,P) | Model II (HR,95%CI,P) |
| --- | --- | --- |
| BRI | 1.102 (0.867, 1.401) 0.427 | 1.716 (1.452, 2.027) <0.001 |
| BRI (quartile) |  |  |
| Q1 | Ref | Ref |
| Q2 | 1.106 (0.648, 1.887) 0.712 | 1.085 (0.592, 1.990) 0.791 |
| Q3 | 0.838 (0.478, 1.472) 0.539 | 1.304 (0.744, 2.283) 0.353 |
| Q4 | 1.115 (0.637, 1.954) 0.702 | 2.434 (1.415, 4.187) 0.001 |
| *P* for trend | 0.856 | <0.001 |

Model I was sensitivity analysis after excluding those with fatty liver. we adjust age, gender, SBP, DBP,

smoking status, ethanol consumption, habit of exercise, ALT, AST, GGT, FBG, HbA1c, HDL-C, TC, TG

Model II was sensitivity analysis after excluding any alcohol consumers. we adjust age, gender, SBP, DBP,

smoking status, ethanol consumption, habit of exercise, ALT, AST, GGT, FBG, HbA1c, HDL-C, TC, TG

BRI: body roundness index; HR: hazard ratios; CI: confidence interval; Ref: reference.

**Table S1.** The results of univariate COX regression. **Table S2.** Relationship between BRI and incident diabetes in different sensitivity analyses

**Table S3. AUC with the 95% CI of BMI, WC, ABSI and BRI for predicting DM stratified by sex.**

| **Variables** | **AUC** | **95% CI lower bound** | **95% CI upper bound** | **Best threshold** | **Specificity** | **Sensitivity** | **Yorden Index** |
| --- | --- | --- | --- | --- | --- | --- | --- |
| **Male** | | | | | | | |
| BMI | 0.6732 | 0.6395 | 0.7069 | 24.6586 | 0.7521 | 0.5092 | 0.2613 |
| WC | 0.6898 | 0.6556 | 0.7240 | 0.8465 | 0.7421 | 0.5824 | 0.3245 |
| ABSI | 0.6371 | 0.6017 | 0.6724 | 0.0048 | 0.7760 | 0.4725 | 0.2485 |
| BRI | 0.7061 | 0.6740 | 0.7382 | 3.2961 | 0.7367 | 0.5934 | 0.3301 |
| **Female** | | | | | | | |
| BMI | 0.7347 | 0.6774 | 0.7920 | 21.2328 | 0.6130 | 0.7792 | 0.3922 |
| WC | 0.7069 | 0.6465 | 0.7673 | 0.7345 | 0.6375 | 0.7013 | 0.3388 |
| ABSI | 0.6941 | 0.6381 | 0.7501 | 0.0063 | 0.5092 | 0.7922 | 0.3014 |
| BRI | 0.7354 | 0.6755 | 0.7953 | 2.8025 | 0.6768 | 0.7013 | 0.3781 |

ABSI: a body shape index; AUC: area under the curve; BRI: body roundness index; BMI: body mass index; CI: confidence interval;

DM: diabetes mellitus; WC: waist circumference.
